# Supplementary material for: Synthesis of Ni(ii)–Mn(ii) complexes using a new mononuclear Ni(ii) complex of an unsymmetrical N2O3 donor ligand: structures, magnetic properties and catalytic oxidase activity
Source: Royal Society of Chemistry journal article supplement (doi:10.1039/d0dt04337k), 2021-01-01
Supplement: d0dt04337k1.pdf [file d0dt04337k1.pdf]

## Supporting Information

### Synthesis of Ni(II)-Mn(II) complexes using a new mononuclear Ni(II) complex of an N<sub>2</sub>O<sub>3</sub> donor unsymmetrical ligand: structures, magnetic properties and catalytic oxidase activity

Souvik Maity,<sup>1</sup> Prithwish Mahapatra,<sup>1</sup> Tanmoy Kumar Ghosh,<sup>1</sup> Rosa M. Gomila,<sup>2</sup> Antonio Frontera<sup>3</sup> and Ashutosh Ghosh\*<sup>1</sup>

1- Department of Chemistry, University College of Science, University of Calcutta, 92 A.P.C. Road, Kolkata 700009, India. E-mail: [ghosh\\_59@yahoo.com](mailto:ghosh_59@yahoo.com)

2-Serveis Científic-Tècnics, Universitat de les Illes Balears, Crta de Valldemossa km 7.5, 07122 Palma de Mallorca (Balears), SPAIN.

3-Departament de Química, Universitat de les Illes Balears, Crta de Valldemossa km 7.5, 07122 Palma de Mallorca (Balears), SPAIN.

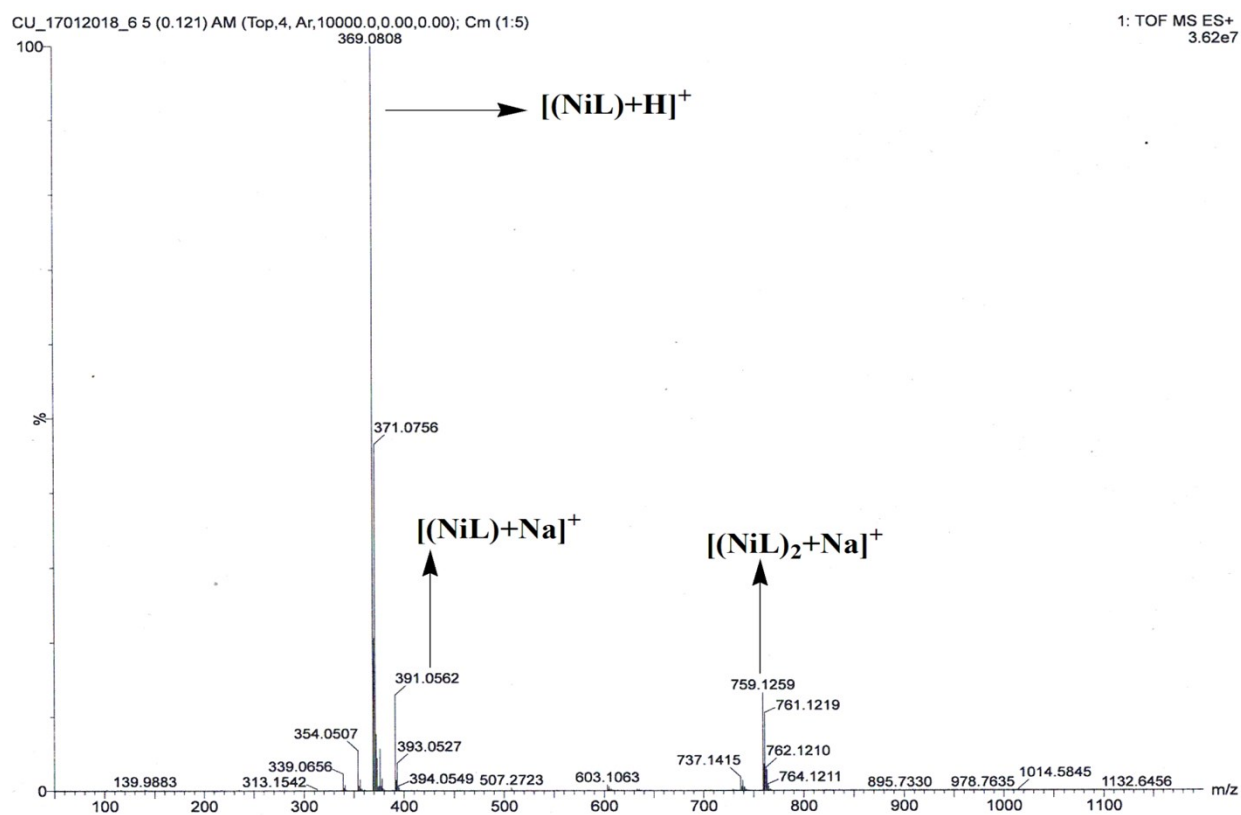

Fig. S1 ESI-mass spectrum of complex 1.

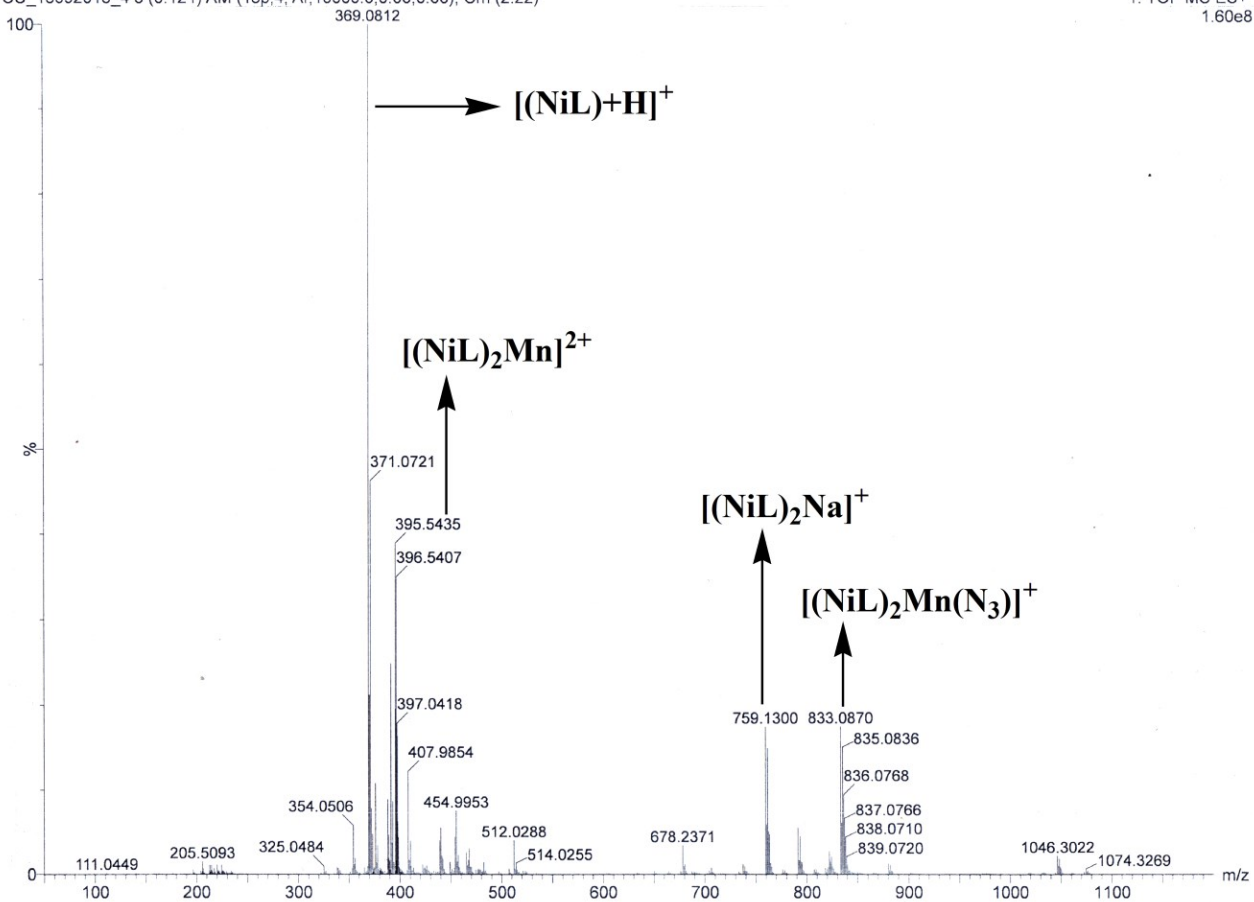

Fig. S2 ESI-mass spectrum of complex 4.

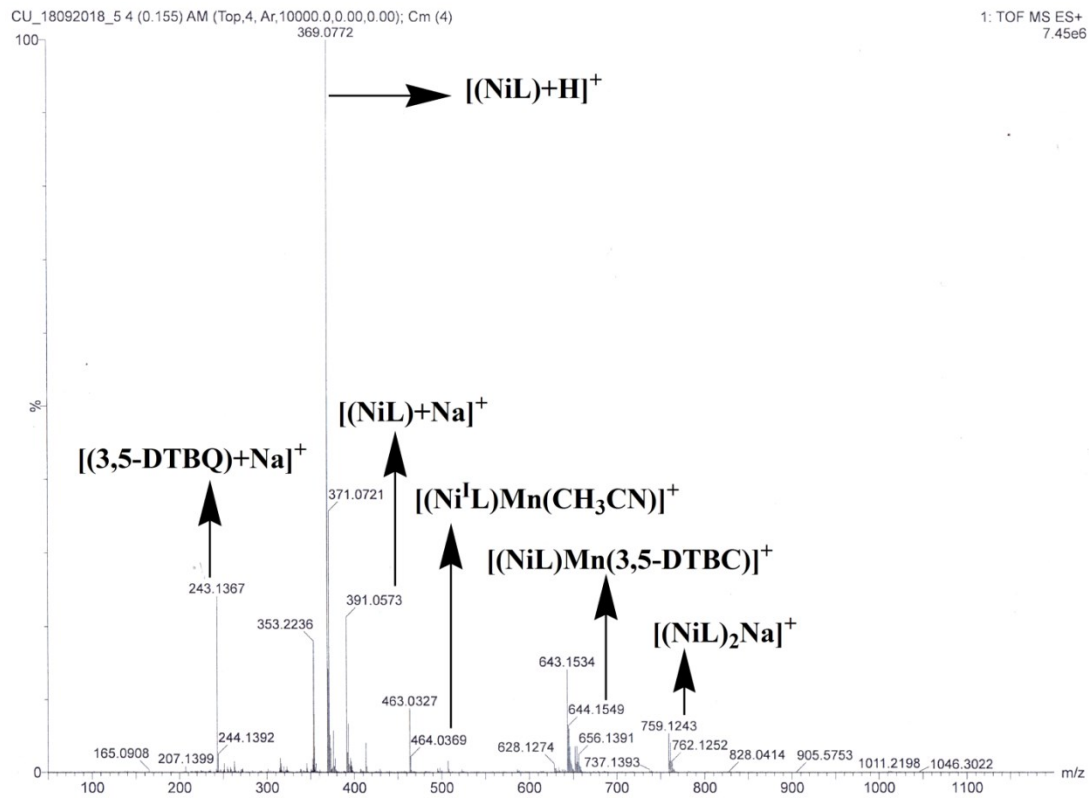

**Fig. S3** ESI-mass spectrum of complex **4** with 3,5-DTBC.

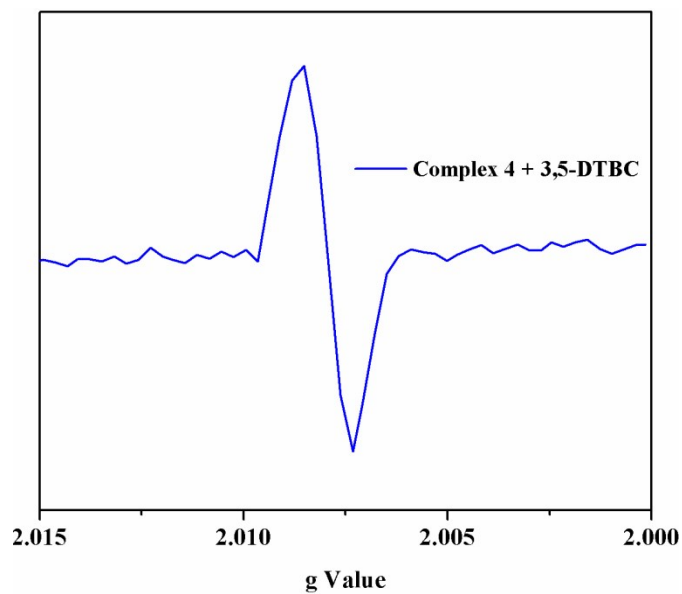

**Fig. S4** EPR spectrum of complex **4** with 3,5-DTBC in acetonitrile at 113 K.

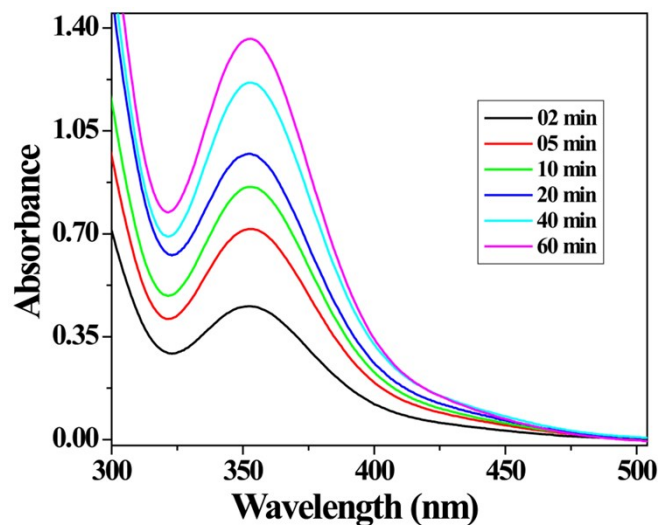

Fig. S5 Increase of the absorption band at around 353 nm during  $\text{H}_2\text{O}_2$  estimation.

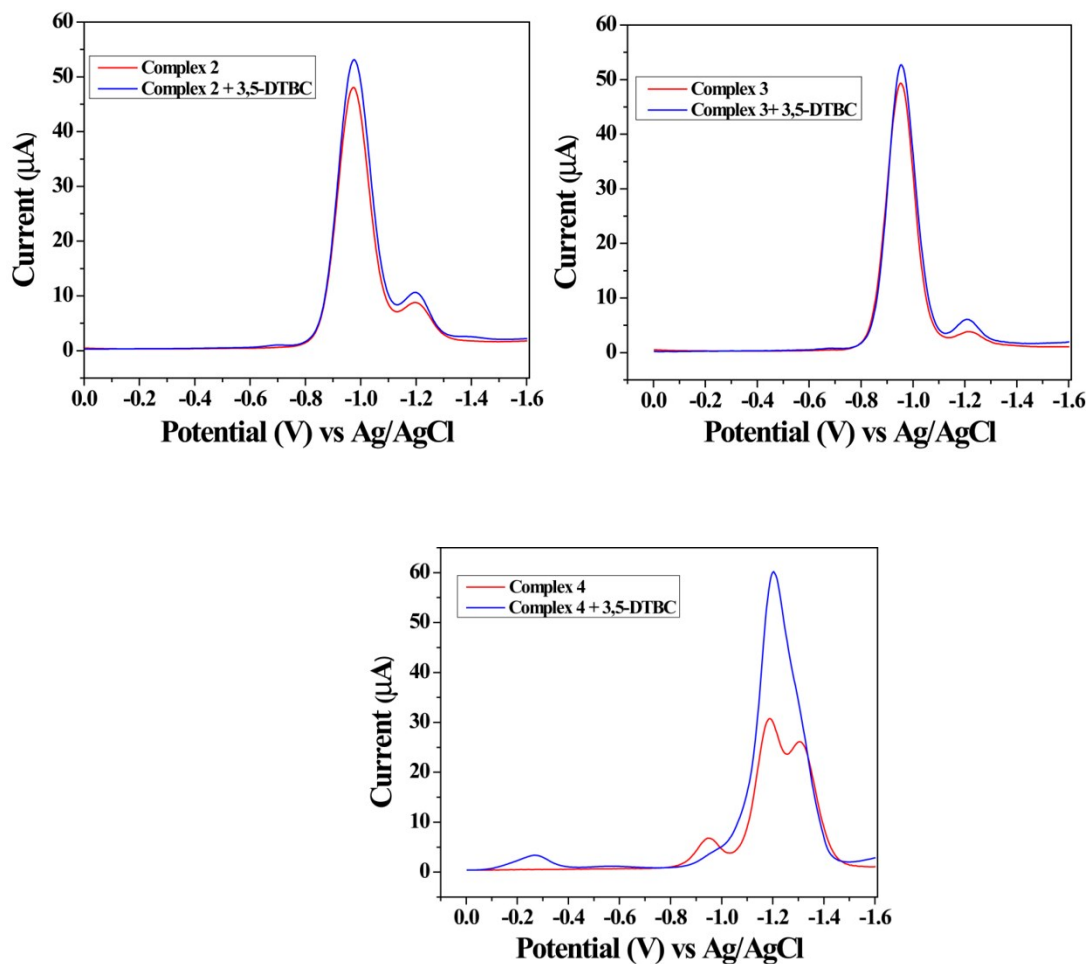

Fig. S6 Differential Pulse Voltammograms (DPVs) of complexes 2 (left), 3 (right) and 4 (middle) and the 1:1 mixture of the complexes with 3,5-DTBC in deoxygenated acetonitrile.

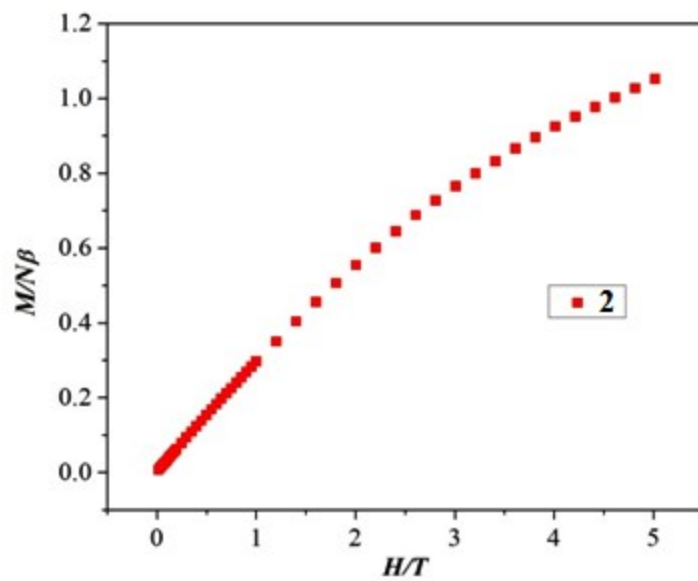

**Fig. S7** Isothermal magnetizations at 2 K for complex 2.

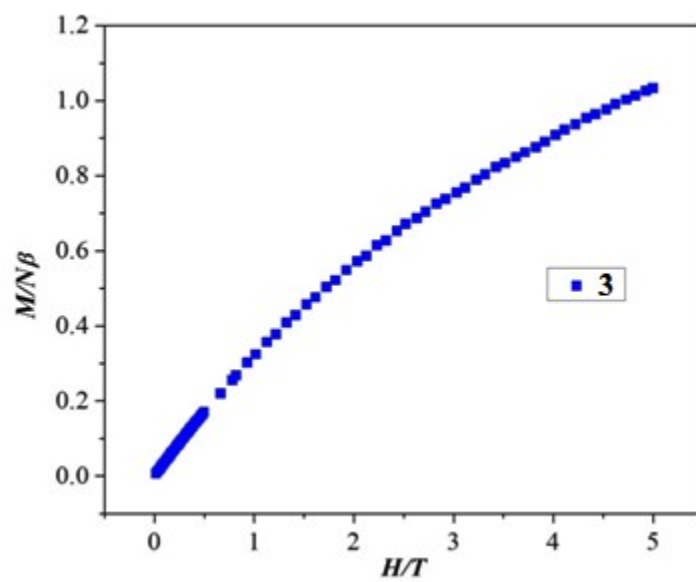

**Fig. S8** Isothermal magnetizations at 2.5 K for complex 3.

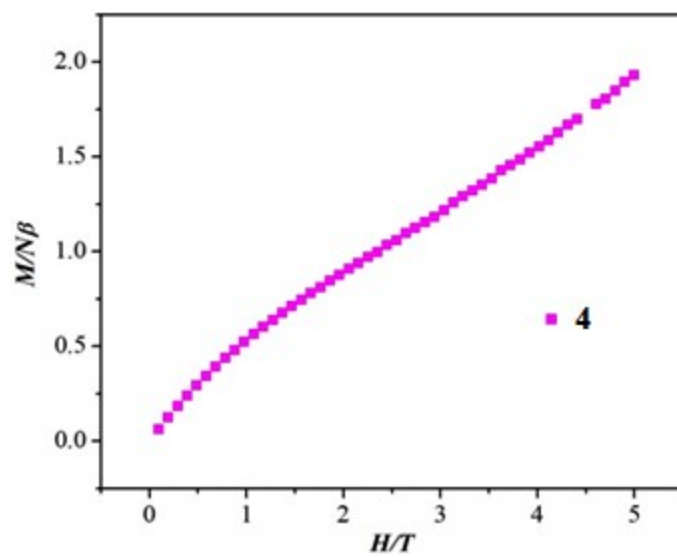

**Fig. S9** Isothermal magnetizations at 2 K for complex **4**.

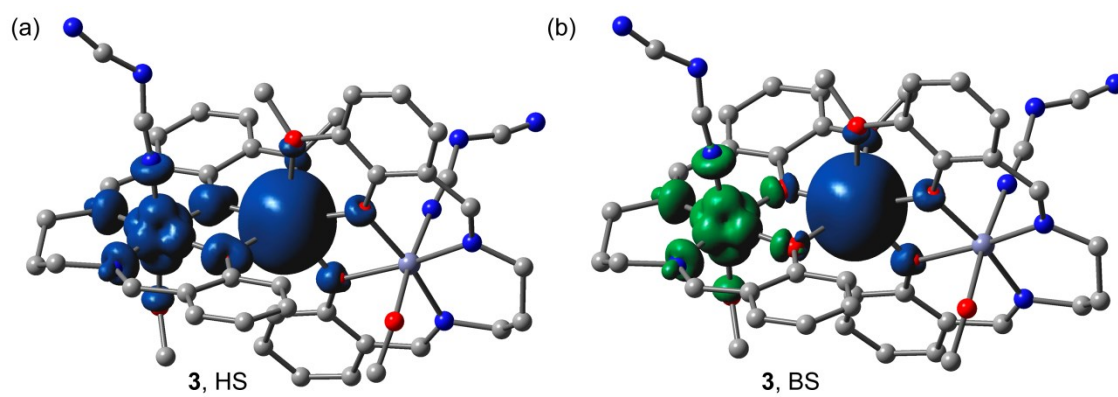

**Fig. S10** High spin (a) and low spin (b) density plots of complex **3**.

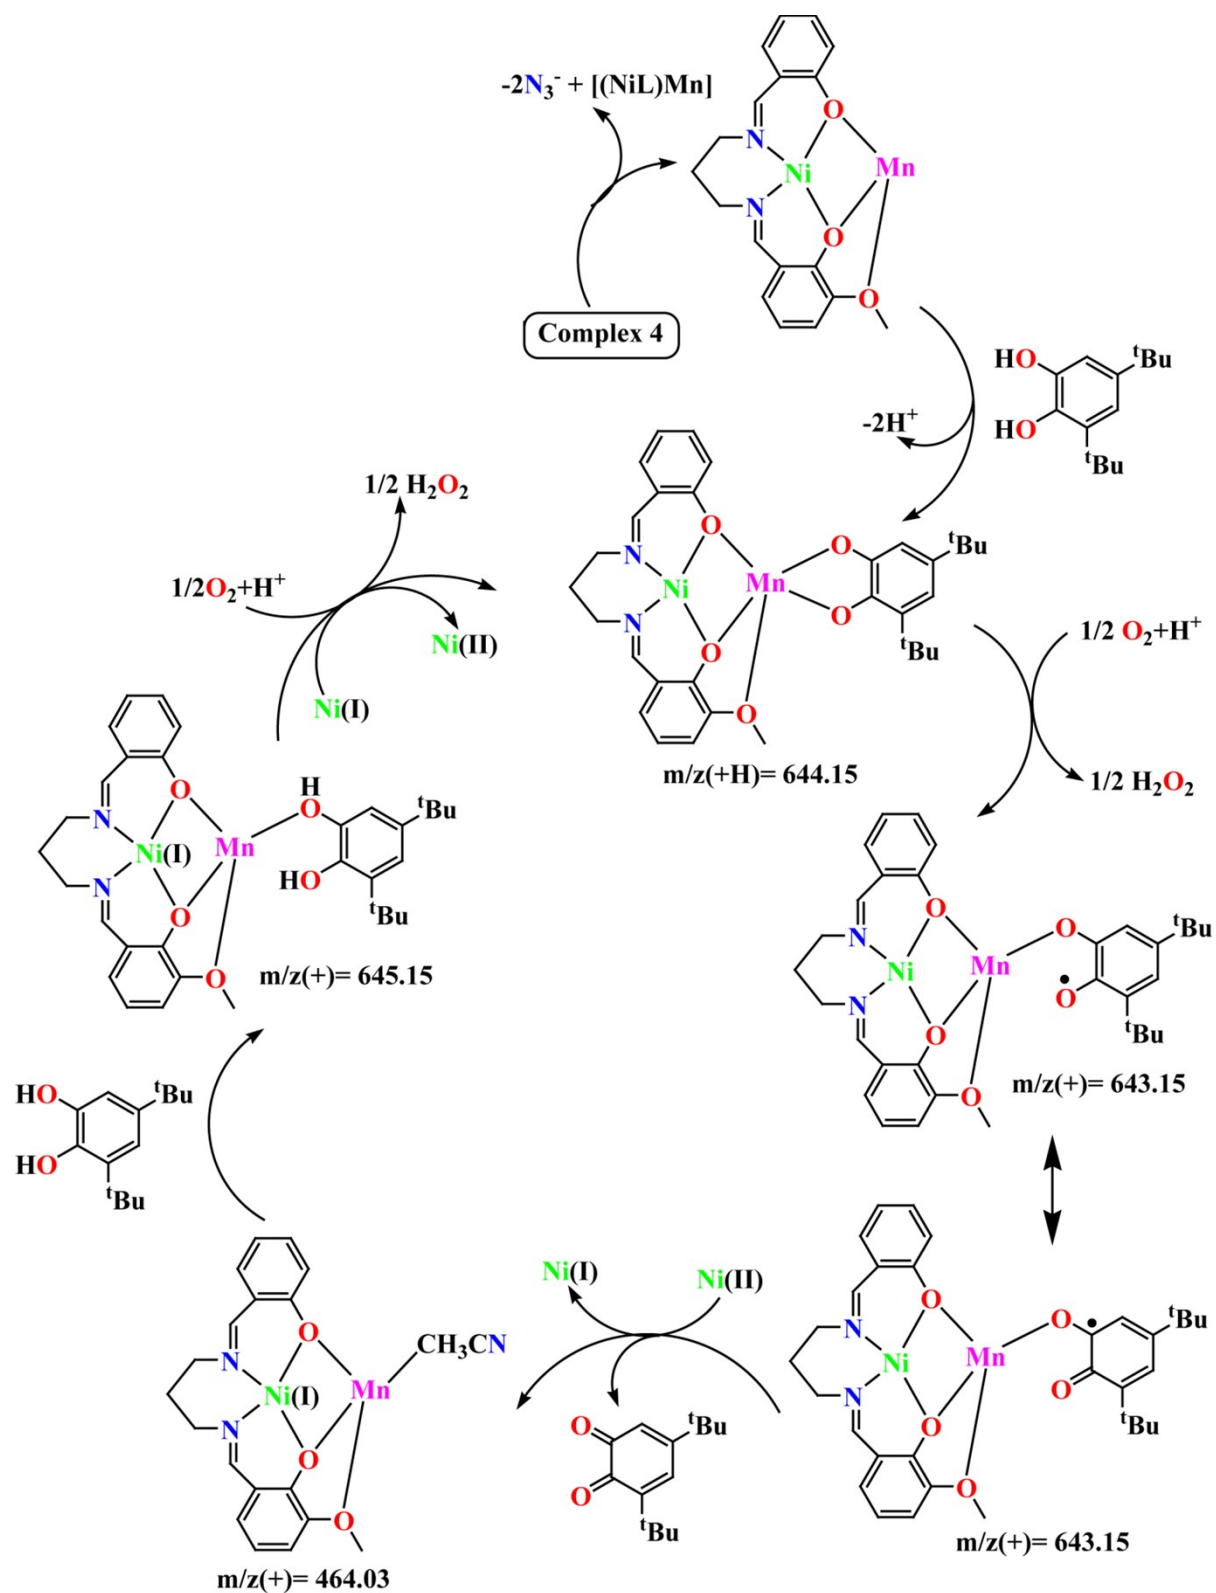

**Scheme S1** Proposed mechanism for catalytic oxidation of 3,5-DTBC to 3,5-DTBQ by complex 4.

**Table S1** Selected bond lengths (Å), bond angles (°) of complexes **2** and **3**.

|                 | Complex <b>2</b> | Complex <b>3</b> |
|-----------------|------------------|------------------|
| Ni(1)–O(1)      | 2.002 (3)        | 2.008(3)         |
| Ni(1)–O(2)      | 2.041(3)         | 2.040(3)         |
| Ni(1)–O(4)      | 2.194(3)         | 2.190(3)         |
| Ni(1)–N(1)      | 2.042(3)         | 2.040(3)         |
| Ni(1)–N(2)      | 2.016(4)         | 2.012(4)         |
| Ni(1)–N(3)      | 2.083(4)         | 2.096(4)         |
| Mn(1)–O(1)      | 2.095(2)         | 2.087(2)         |
| Mn(1)–O(2)      | 2.159(3)         | 2.160(3)         |
| Mn(1)–O(3)      | 2.397(3)         | 2.427(3)         |
| O(1)–Ni(1)–O(2) | 77.61(10)        | 77.54(10)        |
| O(1)–Ni(1)–O(4) | 89.10(11)        | 89.34(12)        |
| O(1)–Ni(1)–N(1) | 90.61(12)        | 90.90(12)        |
| O(1)–Ni(1)–N(2) | 169.31(12)       | 170.11(13)       |
| O(1)–Ni(1)–N(3) | 94.26(13)        | 93.44(14)        |
| O(2)–Ni(1)–O(4) | 90.51(11)        | 89.33(11)        |
| O(2)–Ni(1)–N(1) | 167.02(13)       | 166.90(13)       |
| O(2)–Ni(1)–N(2) | 92.58(12)        | 92.63(13)        |
| O(2)–Ni(1)–N(3) | 97.11(12)        | 96.21(14)        |
| O(4)–Ni(1)–N(1) | 83.82(13)        | 84.35(13)        |
| O(4)–Ni(1)–N(2) | 86.75(13)        | 89.51(14)        |
| O(4)–Ni(1)–N(3) | 172.18(13)       | 174.22(14)       |
| N(1)–Ni(1)–N(2) | 98.72(14)        | 98.76(15)        |
| N(1)–Ni(1)–N(3) | 89.08(14)        | 90.54(15)        |
| N(2)–Ni(1)–N(3) | 91.11(15)        | 88.61(15)        |
| O(1)–Mn(1)–O(2) | 73.09(10)        | 73.26(10)        |
| O(1)–Mn(1)–O(3) | 69.23(10)        | 68.79(10)        |



|                                            |            |            |
|--------------------------------------------|------------|------------|
| O(1)–Mn(1)–O(1) <sup>a</sup>               | 162.95(11) | 161.23(11) |
| O(1)–Mn(1)–O(2) <sup>a</sup>               | 116.97(10) | 118.03(10) |
| O(1)–Mn(1)–O(3) <sup>a</sup>               | 97.34(10)  | 96.32(10)  |
| O(2)–Mn(1)–O(3)                            | 140.62(9)  | 140.55(10) |
| O(1) <sup>a</sup> –Mn(1)–O(2)              | 116.97(10) | 118.03(10) |
| O(2)–Mn(1)–O(2) <sup>a</sup>               | 113.48(10) | 112.22(11) |
| O(2)–Mn(1)–O(3) <sup>a</sup>               | 93.80(10)  | 95.06(10)  |
| O(1) <sup>a</sup> –Mn(1)–O(3)              | 97.34(10)  | 96.32(10)  |
| O(2) <sup>a</sup> –Mn(1)–O(3)              | 93.80(10)  | 95.06(10)  |
| O(3)–Mn(1)–O(3) <sup>a</sup>               | 80.18(9)   | 79.00(9)   |
| O(1) <sup>a</sup> –Mn(1)–O(2) <sup>a</sup> | 73.09(10)  | 73.26(10)  |
| O(1) <sup>a</sup> –Mn(1)–O(3) <sup>a</sup> | 69.23(10)  | 68.79(10)  |
| O(2) <sup>a</sup> –Mn(1)–O(3) <sup>a</sup> | 140.62(9)  | 140.55(10) |
| Ni(1)–O(1)–Mn(1)                           | 106.49(12) | 106.39(12) |
| Ni(1)–O(2)–Mn(1)                           | 102.81(11) | 102.61(12) |

<sup>a</sup> = 1-x,y,3/2-z for complex **2**

1/2-x,1/2-y,z for complex **3**

**Table S2** Selected bond lengths (Å), bond angles (°) of complex **4**.

|                         | Complex4 |
|-------------------------|----------|
| Ni(1)–O(1)              | 1.992(2) |
| Ni(1)–O(2)              | 2.090(2) |
| Ni(1)–O(3)              | 2.181(3) |
| Ni(1)–N(1)              | 2.042(3) |
| Ni(1)–N(2)              | 1.994(3) |
| Ni(1)–N(3) <sup>a</sup> | 2.155(3) |
| Mn(1)–O(1)              | 2.108(2) |
| Mn(1)–O(2)              | 2.251(2) |
| Mn(1)–O(3)              | 2.331(2) |

|                              |            |
|------------------------------|------------|
| Mn(1)–N(3)                   | 2.150(3)   |
| Mn(1)–N(6)                   | 2.174(4)   |
| Mn(1)–O(2) <sup>a</sup>      | 2.317(2)   |
| O(1)–Ni(1)–O(2)              | 80.12(8)   |
| O(1)–Ni(1)–O(4)              | 82.99(10)  |
| O(1)–Ni(1)–N(1)              | 90.20(13)  |
| O(1)–Ni(1)–N(2)              | 169.74(10) |
| O(1)–Ni(1)–N(3) <sup>a</sup> | 94.87(11)  |
| O(2)–Ni(1)–O(4)              | 88.83(9)   |
| O(2)–Ni(1)–N(1)              | 169.66(12) |
| O(2)–Ni(1)–N(2)              | 91.38(9)   |
| O(2)–Ni(1)–N(3) <sup>a</sup> | 81.95(9)   |
| O(4)–Ni(1)–N(1)              | 93.61(12)  |
| O(4)–Ni(1)–N(2)              | 91.16(12)  |
| O(4)–Ni(1)–N(3) <sup>a</sup> | 170.76(10) |
| N(1)–Ni(1)–N(2)              | 98.60(13)  |
| N(1)–Ni(1)–N(3) <sup>a</sup> | 95.38(12)  |
| N(2)–Ni(1)–N(3) <sup>a</sup> | 89.58(13)  |
| O(1)–Mn(1)–O(2)              | 74.08(8)   |
| O(1)–Mn(1)–O(3)              | 70.66(8)   |
| O(1)–Mn(1)–N(3)              | 164.73(11) |
| O(1)–Mn(1)–N(6)              | 96.33(12)  |
| O(1)–Mn(1)–O(2) <sup>a</sup> | 88.57(8)   |
| O(2)–Mn(1)–O(3)              | 144.65(8)  |
| O(2)–Mn(1)–N(3)              | 109.83(10) |
| O(2)–Mn(1)–N(6)              | 93.50(12)  |
| O(2)–Mn(1)–O(2) <sup>a</sup> | 87.87(8)   |
| O(3)–Mn(1)–N(3)              | 103.65(10) |

|                                |            |
|--------------------------------|------------|
| O(3)–Mn(1)–N(6)                | 92.71(12)  |
| O(2) <sup>a</sup> –Mn(1)–O(3)  | 88.87(8)   |
| N(3)–Ni(1)–N(6)                | 98.13(13)  |
| O(2) <sup>a</sup> –Mn(1)–N(3)  | 77.00(10)  |
| O(2) <sup>a</sup> –Mn(1)–N(6)  | 175.11(11) |
| Ni(1)–O(1)–Mn(1)               | 106.23(9)  |
| Ni(1)–O(2)–Mn(1)               | 98.08(8)   |
| Ni(1) <sup>a</sup> –N(3)–Mn(1) | 100.80(12) |
| Mn(1)–N(6)–N(7)                | 127.1(3)   |

<sup>a</sup> = 1-x, 1-y, 1-z for complex **4**

**Table S3** Comparison table for catecholase activities by previously reported complexes.

| Complexes                                                                                                                      | $k_{\text{cat}}$ ( $\text{h}^{-1}$ ) | Solvent      | References |
|--------------------------------------------------------------------------------------------------------------------------------|--------------------------------------|--------------|------------|
| $[(\text{NiL})_2\text{Mn}(\text{NCS})_2]$                                                                                      | 104.5                                | Methanol     | 53         |
| $[(\text{NiL})_2\text{Mn}(\text{NCO})_2]$                                                                                      | 77                                   | Methanol     | 53         |
| $[\{\text{NiL}(\text{EtOH})\}_2\text{Mn}(\text{NO}_2)_2] \cdot 2\text{EtOH}$                                                   | 25.8                                 | Methanol     | 53         |
| $[(\text{NiL})_2\text{Mn}(\text{N}_3)(\text{H}_2\text{O})](\text{ClO}_4) \cdot \text{H}_2\text{O}$                             | 984                                  | Methanol     | 31         |
| $[\{(\text{NiL})_2\text{Mn}(\text{H}_2\text{O})\}_2(\mu_{1,3}\text{N}_3)](\text{ClO}_4)_3$                                     | 2081                                 | Methanol     | 31         |
| $[(\text{NiL})_2\text{Mn}(\text{N}_3)](\text{ClO}_4)$                                                                          | 768                                  | Methanol     | 28         |
| $[(\text{NiL})_2\text{Mn}_2(\text{N}_3)_2(\mu_{1,1}\text{N}_3)_2(\text{CH}_3\text{OH})_2]$                                     | 1985                                 | Methanol     | 28         |
| $[\{(\text{NiL})_2\text{Mn}\}_2(\mu_{1,3}\text{N}_3)(\text{H}_2\text{O})] \cdot (\text{CH}_3\text{OH}) \cdot (\text{ClO}_4)_3$ | 2309                                 | Methanol     | 28         |
| $[(\text{NiL})_2\text{Mn}_2(\text{N}_3)_2(\mu_{1,1}\text{N}_3)_2(\text{CH}_3\text{OH})_2]$                                     | 935                                  | Acetonitrile | This work  |

**Table S4** Correlations of magnetic coupling with bridging angle for earlier reported diphenoxido-bridged  $\text{Ni}^{\text{II}}\text{--Mn}^{\text{II}}$  complexes.

| Complex                                                                                            | $J_{\text{Ni--Mn}}/\text{cm}^{-1}$ | Ni–O–Mn angle/deg | Ref. |
|----------------------------------------------------------------------------------------------------|------------------------------------|-------------------|------|
| $[\text{Mn}^{\text{II}}(\text{Ni}^{\text{III}}\text{L})_2] \cdot 2\text{CH}_3\text{OH}$            | +9.30                              | 86.38             | 52   |
| $[\text{Mn}^{\text{II}}(\text{Ni}^{\text{III}}\text{L})_2(\text{OAc})_4(\text{H}_2\text{O})_2]$    | -0.30                              | 102.31            | 63   |
| $[(\text{NiL})_2\text{Mn}(\text{OCnn})_2(\text{CH}_3\text{OH})_2] \cdot \text{CH}_3\text{OH}$      | +1.38                              | 97.24             | 54   |
| $[(\text{NiL})_2\text{Mn}(\text{OPh})_2(\text{CH}_3\text{OH})_2][(\text{NiL})_2\text{Mn}(\text{O}$ | +0.50                              | 96.43             | 54   |

|                                                                                                                                                         |       |        |           |
|---------------------------------------------------------------------------------------------------------------------------------------------------------|-------|--------|-----------|
| (Ph) <sub>2</sub> ]·H <sub>2</sub> O                                                                                                                    |       |        |           |
| [(NiL) <sub>2</sub> Mn(OSal) <sub>2</sub> (CH <sub>3</sub> OH) <sub>2</sub> ]·2[NiL]                                                                    | -0.24 | 98.51  | 54        |
| [(NiL <sup>1</sup> ) <sub>2</sub> Mn(OOCPh) <sub>2</sub> (H <sub>2</sub> O) <sub>2</sub> ]·CH <sub>3</sub> OH                                           | -0.60 | 97.35  | 51        |
| [(NiL <sup>2</sup> ) <sub>2</sub> Mn(OOCPh) <sub>2</sub> (CH <sub>3</sub> OH) <sub>2</sub> ]·CH <sub>3</sub> OH                                         | +2.00 | 97.34  | 51        |
| [(NiL <sup>3</sup> ) <sub>2</sub> Mn(OOCPh) <sub>2</sub> (H <sub>2</sub> O) <sub>2</sub> ]·CH <sub>3</sub> OH                                           | +1.10 | 97.27  | 51        |
| [(NiL) <sub>2</sub> Mn <sub>2</sub> (N <sub>3</sub> ) <sub>2</sub> (μ <sub>1,1</sub> -N <sub>3</sub> ) <sub>2</sub> (CH <sub>3</sub> OH) <sub>2</sub> ] | -4.95 | 102.58 | 28        |
| [(NiL) <sub>2</sub> Mn(NCS) <sub>2</sub> (CH <sub>3</sub> OH) <sub>2</sub> ]·CH <sub>3</sub> OH                                                         | -4.84 | 104.65 | This work |
| [(NiL) <sub>2</sub> Mn(N(CN) <sub>2</sub> ) <sub>2</sub> (CH <sub>3</sub> OH) <sub>2</sub> ]·CH <sub>3</sub> OH                                         | -5.23 | 104.50 | This work |
| [(NiL) <sub>2</sub> Mn <sub>2</sub> (N <sub>3</sub> ) <sub>2</sub> (μ <sub>1,1</sub> -N <sub>3</sub> ) <sub>2</sub> (CH <sub>3</sub> OH) <sub>2</sub> ] | -2.20 | 102.05 | This work |

**Table S5** Atomic spin densities for the HS and LS configuration for polynuclear complexes **2** and **3**.

| Atom     | HS   | LS    |
|----------|------|-------|
| <b>2</b> |      |       |
| Ni       | 1.74 | -1.74 |
| Mn       | 4.91 | 4.90  |
| O1       | 0.07 | -0.03 |
| O2       | 0.05 | -0.03 |
| <b>3</b> |      |       |
| Ni       | 1.77 | -1.75 |
| Mn       | 4.91 | 4.91  |
| O1       | 0.07 | -0.03 |
| O2       | 0.05 | -0.03 |

**Table S6** Atomic spin densities at for the HS and LS configuration for the three coupling constants of polynuclear complex **4**.

| Atom                  | HS   | LS    |
|-----------------------|------|-------|
| <i>J</i> <sub>1</sub> |      |       |
| Ni1                   | 1.70 | -1.67 |
| Mn1                   | 4.86 | 4.87  |
| O1                    | 0.05 | -0.06 |
| O2                    | 0.03 | -0.04 |
| <i>J</i> <sub>2</sub> |      |       |

|                  |      |       |
|------------------|------|-------|
| Ni1              | 1.72 | -1.75 |
| Mn1              | 4.84 | 4.85  |
| O2               | 0.03 | -0.07 |
| N3 <sup>a</sup>  | 0.02 | -0.03 |
| $J_3$            |      |       |
| Mn1              | 4.86 | -4.84 |
| Mn1 <sup>a</sup> | 4.86 | 4.84  |
| O2               | 0.04 | 0.00  |
| O2 <sup>a</sup>  | 0.04 | 0.00  |

## ORCA INPUT FILES:

### Complex 2:

```

# gosh multispin
#thio_complex 3, replaceone Ni by Zn
#
!B3LYP def2-TZVP RIjk def2/jk UKS grid4
%pal nprocs 4 end
%maxcore 7500
%scf
      MaxIter 900
      brokensym 5,2
end

*xyz08

C      5.06120000    4.44330000    17.64830000
C      4.37990000    3.59440000    18.53640000
C      3.44900000    2.68350000    18.08210000
H      3.00170000    2.13270000    18.68450000
C      3.18360000    2.59410000    16.72870000
H      2.54740000    1.99140000    16.42110000
C      3.85450000    3.38830000    15.84350000
H      3.67290000    3.31170000    14.93470000
C      4.81970000    4.32660000    16.28440000
C      5.51580000    5.08800000    15.26570000
H      5.22060000    4.97310000    14.39240000
C      7.06410000    6.48940000    14.21280000
H      7.23370000    5.76270000    13.59390000
H      6.37650000    7.04650000    13.81240000
C      8.15920000    7.20880000    14.28180000
H      8.01660000    7.84990000    13.56690000
H      8.81990000    6.59250000    13.93110000
C      8.90950000    7.94290000    15.16400000
H      8.73600000    8.88200000    14.99400000
H      9.84510000    7.78240000    14.96430000
C      9.46270000    8.36140000    17.37750000
H      10.05590000    8.94680000    16.96340000
C      9.52920000    8.32860000    18.81130000
C      10.53380000    9.11640000    19.39840000
H      11.05440000    9.65530000    18.84640000
C      10.77790000    9.12820000    20.73080000
H      11.45160000    9.66160000    21.08820000
C      9.99670000    8.32040000    21.54840000

```

|    |             |            |             |
|----|-------------|------------|-------------|
| H  | 10.16010000 | 8.30030000 | 22.46410000 |
| C  | 8.98640000  | 7.54990000 | 21.02290000 |
| H  | 8.47610000  | 7.02190000 | 21.59270000 |
| C  | 8.70490000  | 7.53800000 | 19.65760000 |
| C  | 4.39740000  | 2.74460000 | 20.79470000 |
| H  | 3.45190000  | 2.74550000 | 20.96140000 |
| H  | 4.86560000  | 2.89780000 | 21.61700000 |
| H  | 4.65640000  | 1.89480000 | 20.43270000 |
| C  | 6.04970000  | 9.34620000 | 17.70530000 |
| H  | 6.70170000  | 9.30880000 | 18.40940000 |
| H  | 5.21200000  | 9.64980000 | 18.06140000 |
| H  | 6.34850000  | 9.95340000 | 17.02540000 |
| C  | 9.14640000  | 3.90990000 | 16.51800000 |
| H  | 5.19930000  | 8.06960000 | 16.64500000 |
| Mn | 6.21720000  | 5.61650000 | 20.23300000 |
| N  | 6.49190000  | 5.90130000 | 15.42940000 |
| N  | 8.70330000  | 7.69940000 | 16.59430000 |
| N  | 8.63760000  | 4.80620000 | 17.03140000 |
| Ni | 7.30610000  | 6.39500000 | 17.23530000 |
| O  | 5.91920000  | 5.30590000 | 18.18250000 |
| O  | 7.69540000  | 6.80040000 | 19.19740000 |
| O  | 4.71950000  | 3.78310000 | 19.86020000 |
| O  | 5.88710000  | 8.06600000 | 17.15140000 |
| S  | 9.86820000  | 2.63410000 | 15.81520000 |
| C  | 7.37310000  | 4.44330000 | 22.81770000 |
| C  | 8.05440000  | 3.59440000 | 21.92960000 |
| C  | 8.98530000  | 2.68350000 | 22.38390000 |
| H  | 9.43260000  | 2.13270000 | 21.78150000 |
| C  | 9.25070000  | 2.59410000 | 23.73740000 |
| H  | 9.88690000  | 1.99140000 | 24.04490000 |
| C  | 8.57980000  | 3.38830000 | 24.62250000 |
| H  | 8.76140000  | 3.31170000 | 25.53140000 |
| C  | 7.61460000  | 4.32660000 | 24.18170000 |
| C  | 6.91850000  | 5.08800000 | 25.20040000 |
| H  | 7.21370000  | 4.97310000 | 26.07360000 |
| C  | 5.37020000  | 6.48940000 | 26.25330000 |
| H  | 5.20060000  | 5.76270000 | 26.87220000 |
| H  | 6.05780000  | 7.04650000 | 26.65360000 |
| C  | 4.27510000  | 7.20880000 | 26.18420000 |
| H  | 4.41770000  | 7.84990000 | 26.89910000 |
| H  | 3.61450000  | 6.59250000 | 26.53490000 |
| C  | 3.52480000  | 7.94290000 | 25.30210000 |
| H  | 3.69830000  | 8.88200000 | 25.47200000 |
| H  | 2.58920000  | 7.78240000 | 25.50170000 |
| C  | 2.97160000  | 8.36140000 | 23.08860000 |
| H  | 2.37840000  | 8.94680000 | 23.50270000 |
| C  | 2.90510000  | 8.32860000 | 21.65470000 |
| C  | 1.90050000  | 9.11640000 | 21.06770000 |
| H  | 1.37990000  | 9.65530000 | 21.61970000 |
| C  | 1.65640000  | 9.12820000 | 19.73530000 |
| H  | 0.98270000  | 9.66160000 | 19.37780000 |
| C  | 2.43760000  | 8.32040000 | 18.91760000 |
| H  | 2.27420000  | 8.30030000 | 18.00200000 |
| C  | 3.44800000  | 7.54990000 | 19.44310000 |
| H  | 3.95820000  | 7.02190000 | 18.87340000 |
| C  | 3.72940000  | 7.53800000 | 20.80850000 |
| C  | 8.03690000  | 2.74460000 | 19.67140000 |
| H  | 8.98240000  | 2.74550000 | 19.50460000 |
| H  | 7.56870000  | 2.89780000 | 18.84910000 |
| H  | 7.77790000  | 1.89480000 | 20.03340000 |
| C  | 6.38460000  | 9.34620000 | 22.76080000 |
| H  | 5.73260000  | 9.30880000 | 22.05670000 |
| H  | 7.22230000  | 9.64980000 | 22.40470000 |
| H  | 6.08580000  | 9.95340000 | 23.44060000 |
| C  | 3.28790000  | 3.90990000 | 23.94810000 |
| H  | 7.23510000  | 8.06960000 | 23.82100000 |
| N  | 5.94240000  | 5.90130000 | 25.03660000 |
| N  | 3.73100000  | 7.69940000 | 23.87170000 |
| N  | 3.79670000  | 4.80620000 | 23.43470000 |
| Zn | 5.12820000  | 6.39500000 | 23.23080000 |
| O  | 6.51510000  | 5.30590000 | 22.28360000 |

|   |            |            |             |
|---|------------|------------|-------------|
| O | 4.73890000 | 6.80040000 | 21.26870000 |
| O | 7.71480000 | 3.78310000 | 20.60590000 |
| O | 6.54730000 | 8.06600000 | 23.31470000 |
| S | 2.56610000 | 2.63410000 | 24.65080000 |

\*

## Complex 4:

```
# gosh multispin
#azidaMn-Mn-Zn2, replace 2 Ni by 2 Zn
#
!B3LYP def2-TZVP RIjk def2/jk UKS grid4
%pal nprocs 8 end
%maxcore 10000
%scf
      MaxIter 900
      brokensym 5,5
end

* xyz 0 11
C      6.55300000    7.82430000    9.34500000
C      7.87230000    8.30600000    9.21050000
C      8.71520000    8.41740000   10.27760000
H      9.58050000    8.73760000   10.16370000
C      8.25770000    8.04310000   11.54710000
H      8.82500000    8.10700000   12.28140000
C      6.98820000    7.58350000   11.70870000
H      6.69480000    7.35650000   12.56130000
C      6.10690000    7.44420000   10.62430000
C      4.78500000    6.95680000   10.88580000
H      4.57230000    6.83160000   11.78250000
C      2.55630000    6.23600000   10.62550000
H      2.70270000    5.89410000   11.52130000
H      1.97380000    7.00850000   10.69690000
C      1.86690000    5.18800000    9.81870000
H      2.47590000    4.43970000    9.72530000
H      1.10560000    4.87450000   10.33210000
C      1.38610000    5.54310000    8.48020000
H      0.84510000    6.34550000    8.54590000
H      0.81380000    4.82960000    8.15600000
C      2.29010000    5.28890000    6.33360000
H      1.54250000    4.74840000    6.22020000
C      3.12310000    5.47350000    5.15920000
C      2.78370000    4.67790000    4.03650000
H      2.11130000    4.04120000    4.11480000
C      3.42500000    4.83110000    2.84360000
H      3.19610000    4.29310000    2.12020000
C      4.39890000    5.77120000    2.71280000
H      4.82140000    5.88520000    1.89210000
C      4.76490000    6.55460000    3.78360000
H      5.44480000    7.18030000    3.68010000
C      4.13460000    6.42580000    5.02350000
C      9.43680000    9.30530000    7.67590000
H      9.50570000   10.07640000    8.24330000
H      9.48880000    9.57830000    6.75690000
H      10.15560000    8.69930000    7.87060000
C      5.04290000    3.68030000    7.78930000
H      4.35850000    3.45100000    8.42190000
H      5.83860000    3.17870000    7.98280000
H      4.74170000    3.47170000    6.90190000
Mn     6.61270000    7.98250000    6.32910000
N      3.86410000    6.67160000   10.05810000
N      2.45160000    5.77400000    7.49570000
N      7.37860000    8.76850000    4.48070000
N      7.86010000    8.18220000    3.55540000
N      8.32030000    7.63750000    2.66840000
N      7.45540000    5.98360000    6.18560000
N      8.40000000    5.74330000    5.97710000
N      9.53880000    5.33250000    5.67360000
Zn     4.05850000    6.82690000    8.03090000
```

|    |            |             |             |
|----|------------|-------------|-------------|
| O  | 5.80520000 | 7.75580000  | 8.26260000  |
| O  | 4.50030000 | 7.26230000  | 6.03560000  |
| O  | 8.19030000 | 8.65420000  | 7.90800000  |
| O  | 5.32360000 | 5.05720000  | 7.87820000  |
| H  | 6.05700000 | 5.19150000  | 7.43900000  |
| C  | 3.73410000 | 9.58500000  | 2.99160000  |
| C  | 2.41480000 | 9.10330000  | 3.12610000  |
| C  | 1.57190000 | 8.99190000  | 2.05900000  |
| H  | 0.70660000 | 8.67170000  | 2.17290000  |
| C  | 2.02930000 | 9.36620000  | 0.78950000  |
| H  | 1.46210000 | 9.30230000  | 0.05520000  |
| C  | 3.29890000 | 9.82580000  | 0.62790000  |
| H  | 3.59230000 | 10.05280000 | -0.22460000 |
| C  | 4.18020000 | 9.96510000  | 1.71230000  |
| C  | 5.50210000 | 10.45250000 | 1.45080000  |
| H  | 5.71480000 | 10.57770000 | 0.55420000  |
| C  | 7.73070000 | 11.17330000 | 1.71110000  |
| H  | 7.58440000 | 11.51520000 | 0.81530000  |
| H  | 8.31330000 | 10.40080000 | 1.63970000  |
| C  | 8.42020000 | 12.22130000 | 2.51790000  |
| H  | 7.81120000 | 12.96960000 | 2.61130000  |
| H  | 9.18150000 | 12.53480000 | 2.00450000  |
| C  | 8.90100000 | 11.86620000 | 3.85640000  |
| H  | 9.44190000 | 11.06380000 | 3.79080000  |
| H  | 9.47330000 | 12.57970000 | 4.18060000  |
| C  | 7.99700000 | 12.12040000 | 6.00300000  |
| H  | 8.74460000 | 12.66090000 | 6.11640000  |
| C  | 7.16400000 | 11.93580000 | 7.17750000  |
| C  | 7.50330000 | 12.73140000 | 8.30010000  |
| H  | 8.17580000 | 13.36810000 | 8.22180000  |
| C  | 6.86210000 | 12.57820000 | 9.49300000  |
| H  | 7.09100000 | 13.11620000 | 10.21640000 |
| C  | 5.88820000 | 11.63810000 | 9.62380000  |
| H  | 5.46570000 | 11.52410000 | 10.44460000 |
| C  | 5.52210000 | 10.85470000 | 8.55300000  |
| H  | 4.84230000 | 10.22900000 | 8.65650000  |
| C  | 6.15240000 | 10.98350000 | 7.31320000  |
| C  | 0.85030000 | 8.10400000  | 4.66080000  |
| H  | 0.78130000 | 7.33290000  | 4.09330000  |
| H  | 0.79820000 | 7.83100000  | 5.57970000  |
| H  | 0.13150000 | 8.71000000  | 4.46600000  |
| C  | 5.24420000 | 13.72900000 | 4.54730000  |
| H  | 5.92850000 | 13.95830000 | 3.91480000  |
| H  | 4.44850000 | 14.23060000 | 4.35380000  |
| H  | 5.54540000 | 13.93760000 | 5.43480000  |
| Mn | 3.67440000 | 9.42680000  | 6.00760000  |
| N  | 6.42290000 | 10.73770000 | 2.27860000  |
| N  | 7.83550000 | 11.63530000 | 4.84090000  |
| N  | 2.90850000 | 8.64080000  | 7.85600000  |
| N  | 2.42690000 | 9.22710000  | 8.78120000  |
| N  | 1.96670000 | 9.77180000  | 9.66820000  |
| N  | 2.83170000 | 11.42570000 | 6.15100000  |
| N  | 1.88710000 | 11.66600000 | 6.35950000  |
| N  | 0.74830000 | 12.07680000 | 6.66300000  |
| Zn | 6.22860000 | 10.58240000 | 4.30570000  |
| O  | 4.48190000 | 9.65350000  | 4.07400000  |
| O  | 5.78680000 | 10.14700000 | 6.30110000  |
| O  | 2.09670000 | 8.75510000  | 4.42860000  |
| O  | 4.96350000 | 12.35210000 | 4.45850000  |
| H  | 4.23000000 | 12.21780000 | 4.89760000  |

\*

## ORCA OUTPUT FILES:

### Complex 2

```
*****
* O R C A *
*****
```



--- An Ab Initio, DFT and Semiempirical electronic structure package ---

```
#####  
#                               -***-                               #  
#           Department of theory and spectroscopy                #  
#           Directorship: Frank Neese                            #  
#           Max Planck Institute fuer Kohlenforschung              #  
#           Kaiser Wilhelm Platz 1                               #  
#           D-45470 Muelheim/Ruhr                                 #  
#           Germany                                              #  
#           All rights reserved                                    #  
#           -***-                                                #  
#####
```

Program Version 4.1.2 - RELEASE -

[...]

-----  
BROKEN SYMMETRY MAGNETIC COUPLING ANALYSIS  
-----

S(High-Spin) = 3.5  
<S\*\*2>(High-Spin) = 15.7590  
<S\*\*2>(BrokenSym) = 5.7514  
E(High-Spin) = -7714.777611 Eh  
E(BrokenSym) = -7714.778007 Eh  
E(High-Spin)-E(BrokenSym) = 0.0108 eV      87.027 cm\*\*<sup>-1</sup> (ANTIFERROMAGNETIC coupling)

-----  
| Spin-Hamiltonian Analysis based on H(HDvV) = -2J\*SA\*SB |  
-----  
| J(1) =      -7.10 cm\*\*<sup>-1</sup>      (from -(E[HS]-E[BS])/Smax\*\*2)      |  
| J(2) =      -5.53 cm\*\*<sup>-1</sup>      (from -(E[HS]-E[BS])/(Smax\*(Smax+1)))      |  
| J(3) =      -8.70 cm\*\*<sup>-1</sup>      (from -(E[HS]-E[BS])/(<S\*\*2>HS-<S\*\*2>BS))      |  
-----

J(1): (a) A.P. Ginsberg J. Am. Chem. Soc. 102 (1980), 111  
      (b) L. Noodleman J. Chem. Phys. 74 (1981), 5737  
      (c) L. Noodleman E.R. Davidson Chem. Phys. 109 (1986), 131  
J(2) (d) A. Bencini D. Gatteschi J. Am. Chem. Soc. 108 (1980), 5763  
J(3) (e) K. Yamaguchi Y. Takahara T. Fueno in: V.H. Smith (Ed.)  
      Applied Quantum Chemistry. Reidel, Dordrecht (1986), pp 155  
      (f) T.Soda et al. Chem. Phys. Lett., 319, (2000), 223

-----  
TIMINGS  
-----

Total SCF time: 1 days 22 hours 41 min 49 sec

|                            |      |                |          |
|----------------------------|------|----------------|----------|
| Total time                 | .... | 168109.869 sec |          |
| Sum of individual times    | .... | 32593.462 sec  | ( 19.4%) |
| Fock matrix formation      | .... | 0.000 sec      | ( 0.0%)  |
| Diagonalization            | .... | 0.000 sec      | ( 0.0%)  |
| Density matrix formation   | .... | 0.000 sec      | ( 0.0%)  |
| Population analysis        | .... | 32593.462 sec  | ( 19.4%) |
| Initial guess              | .... | 0.000 sec      | ( 0.0%)  |
| Orbital Transformation     | .... | 0.000 sec      | ( 0.0%)  |
| Orbital Orthonormalization | .... | 0.000 sec      | ( 0.0%)  |
| DIIS solution              | .... | 0.000 sec      | ( 0.0%)  |
| Grid generation            | .... | 0.000 sec      | ( 0.0%)  |

-----  
FINAL SINGLE POINT ENERGY      -7714.778007105625  
-----

\*\*\*\*\*  
\* ORCA property calculations \*  
\*\*\*\*\*

-----  
Active property flags  
-----

(+) Dipole Moment

-----  
ORCA ELECTRIC PROPERTIES CALCULATION  
-----

Dipole Moment Calculation ... on  
Quadrupole Moment Calculation ... off  
Polarizability Calculation ... off  
GBWName ... thio\_complex2\_Zn\_BS52.gbw  
Electron density file ... thio\_complex2\_Zn\_BS52.scfp.tmp  
The origin for moment calculation is the CENTER OF MASS = (11.734695, 11.141024 38.273501)

-----  
DIPOLE MOMENT  
-----

|                          | X        | Y         | Z        |
|--------------------------|----------|-----------|----------|
| Electronic contribution: | -3.01033 | -19.00040 | 8.17434  |
| Nuclear contribution :   | 2.96791  | 25.37253  | -8.17120 |
| Total Dipole Moment :    | -0.04242 | 6.37213   | 0.00314  |
| Magnitude (a.u.) :       | 6.37227  |           |          |
| Magnitude (Debye) :      | 16.19703 |           |          |

-----  
Rotational spectrum  
-----

Rotational constants in cm-1: 0.001947 0.001106 0.001099  
Rotational constants in MHz : 58.359760 33.166680 32.959921

Dipole components along the rotational axes:  
x,y,z [a.u.] : 0.028412 0.022929 -6.372169  
x,y,z [Debye]: 0.072218 0.058282 -16.196768

Timings for individual modules:

Sum of individual times ... 168174.647 sec (=2802.911 min)  
GTO integral calculation ... 10.308 sec (= 0.172 min) 0.0 %  
SCF iterations ... 168164.339 sec (=2802.739 min) 100.0 %  
\*\*\*ORCA TERMINATED NORMALLY\*\*\*  
TOTAL RUN TIME: 1 days 22 hours 42 minutes 56 seconds 982 msec

## Complex 4

\*\*\*\*\*  
\* O R C A \*  
\*\*\*\*\*

--- An Ab Initio, DFT and Semiempirical electronic structure package ---

#####  
# -\*\*\*- #  
# Department of theory and spectroscopy #

```

#           Directorship: Frank Neese           #
#           Max Planck Institute fuer Kohlenforschung #
#           Kaiser Wilhelm Platz 1             #
#           D-45470 Muelheim/Ruhr             #
#           Germany                           #
#
#           All rights reserved                 #
#           -***-                             #
#####

```

[...]

Program Version 4.2.1 - RELEASE -

-----  
BROKEN SYMMETRY MAGNETIC COUPLING ANALYSIS  
-----

```

S(High-Spin)          = 5.0
<S**2>(High-Spin)    = 30.0157
<S**2>(BrokenSym)    = 5.0124
E(High-Spin)         = -8811.595969 Eh
E(BrokenSym)         = -8811.596205 Eh
E(High-Spin)-E(BrokenSym) = 0.0064 eV      51.818 cm**-1 (ANTIFERROMAGNETIC coupling)

```

```

-----
| Spin-Hamiltonian Analysis based on H(HDvV) = -2J*SA*SB |
-----
| J(1) = -2.07 cm**-1 (from -(E[HS]-E[BS])/Smax**2) |
| J(2) = -1.73 cm**-1 (from -(E[HS]-E[BS])/(Smax*(Smax+1))) |
| J(3) = -2.07 cm**-1 (from -(E[HS]-E[BS])/(<S**2>HS-<S**2>BS)) |
-----

```

- J(1): (a) A.P. Ginsberg J. Am. Chem. Soc. 102 (1980), 111  
(b) L. Noodleman J. Chem. Phys. 74 (1981), 5737  
(c) L. Noodleman E.R. Davidson Chem. Phys. 109 (1986), 131  
J(2) (d) A. Bencini D. Gatteschi J. Am. Chem. Soc. 108 (1980), 5763  
J(3) (e) K. Yamaguchi Y. Takahara T. Fueno in: V.H. Smith (Ed.)  
Applied Quantum Chemistry. Reidel, Dordrecht (1986), pp 155  
(f) T.Soda et al. Chem. Phys. Lett., 319, (2000), 223

-----  
TIMINGS  
-----

Total SCF time: 1 days 21 hours 11 min 40 sec

```

Total time          .... 162700.879 sec
Sum of individual times .... 42620.788 sec ( 26.2%)

Fock matrix formation .... 0.000 sec ( 0.0%)
Diagonalization    .... 0.000 sec ( 0.0%)
Density matrix formation .... 0.000 sec ( 0.0%)
Population analysis .... 42620.788 sec ( 26.2%)
Initial guess      .... 0.000 sec ( 0.0%)
Orbital Transformation .... 0.000 sec ( 0.0%)
Orbital Orthonormalization .... 0.000 sec ( 0.0%)
DIIS solution      .... 0.000 sec ( 0.0%)
Grid generation    .... 0.000 sec ( 0.0%)

```

-----  
FINAL SINGLE POINT ENERGY -8811.596205104523  
-----

```

*****
* ORCA property calculations *
*****

```

-----  
Active property flags  
-----

(+) Dipole Moment

-----  
ORCA ELECTRIC PROPERTIES CALCULATION  
-----

Dipole Moment Calculation ... on  
Quadrupole Moment Calculation ... off  
Polarizability Calculation ... off  
GBWName ... azidaMn2Zn2.gbw  
Electron density file ... azidaMn2Zn2.scfp  
The origin for moment calculation is the CENTER OF MASS = ( 9.719880, 16.449405 11.656425)

-----  
DIPOLE MOMENT  
-----

|                          | X        | Y        | Z        |
|--------------------------|----------|----------|----------|
| Electronic contribution: | 0.00043  | 0.00002  | -0.00015 |
| Nuclear contribution :   | -0.00022 | -0.00000 | -0.00021 |
| -----                    |          |          |          |
| Total Dipole Moment :    | 0.00021  | 0.00002  | -0.00036 |
| -----                    |          |          |          |
| Magnitude (a.u.) :       | 0.00042  |          |          |
| Magnitude (Debye) :      | 0.00106  |          |          |

-----  
Rotational spectrum  
-----

|                               |           |           |           |
|-------------------------------|-----------|-----------|-----------|
| Rotational constants in cm-1: | 0.001608  | 0.001321  | 0.001120  |
| Rotational constants in MHz : | 48.214959 | 39.609306 | 33.570329 |

Dipole components along the rotational axes:  
x,y,z [a.u.] : -0.000340 0.000020 -0.000238  
x,y,z [Debye]: -0.000864 0.000052 -0.000606

Timings for individual modules:

|                          |     |                                |         |
|--------------------------|-----|--------------------------------|---------|
| Sum of individual times  | ... | 162784.947 sec (=2713.082 min) |         |
| GTO integral calculation | ... | 20.290 sec (= 0.338 min)       | 0.0 %   |
| SCF iterations           | ... | 162764.657 sec (=2712.744 min) | 100.0 % |

\*\*\*\*ORCA TERMINATED NORMALLY\*\*\*\*

TOTAL RUN TIME: 1 days 21 hours 13 minutes 8 seconds 817 msec
